# Supplementary material
Source: HighWire-hosted journal article supplement (https://erj.ersjournals.com/highwire/filestream/113217/field_highwire_adjunct_files/0/Online_supplementary_data.pdf)
Supplement: Online_supplementary_data.pdf [file Online_supplementary_data.pdf]

Online supplementary data

## **Materials and Methods**

**Table 1.** Antibodies used for immunohistochemistry, immunofluorescence and Western blotting

| <b>Target</b> | <b>Antibody</b> | <b>Clone</b>      | <b>Epitope location</b>            | <b>Supplier</b>               | <b>Use</b> |
|---------------|-----------------|-------------------|------------------------------------|-------------------------------|------------|
| <b>ET-A</b>   | AER-001A        | rabbit polyclonal | intracellular c-terminus           | Alomone Labs                  | IH         |
| <b>ET-A</b>   | 53D             | rabbit polyclonal |                                    | A.Davenport (Univ. Cambridge) | IH         |
| <b>ET-A</b>   | ab12977         | rabbit polyclonal | extracellular 2 <sup>nd</sup> loop | Abcam plc                     | IH, IF     |
| <b>ETA</b>    | Ab76259         | rabbit polyclonal | intracellular c-terminal           | Abcam plc                     | WB         |
| <b>ETB</b>    | AER-002B        | rabbit polyclonal | intracellular i3 loop              | Alomone Labs                  | IH         |
| <b>ETB</b>    | 51D             | rabbit polyclonal |                                    | A.Davenport (Univ. Cambridge) | IH         |
| <b>ETB</b>    | ab12980         | rabbit polyclonal | extracellular n-terminal           | Abcam plc                     | IH, IF     |
| <b>ETB</b>    | ab39960         | rabbit polyclonal | peptide ET-B residue 1-100         | Abcam plc                     | WB         |
| <b>eNOS</b>   | sc654           | rabbit polyclonal | c-terminus                         | Santa Cruz Biotech            | IH         |
| <b>CD31</b>   | 1A10            | mouse monoclonal  | Extracellular domain               | Zymed                         | IH, IF     |

### Semiquantitative analysis of immunohistochemical staining

Each anatomical region of the vessel wall was scored separately. Scoring was: - 0 for unlabelled, 0.5 for patchy labelling, 1 for uniform weak labelling and 2 for uniformly strong labelling of the media and intima, including proliferative cell layers, and for the endothelium.

### Western blotting of endothelial cell extracts

Protein samples were separated using a 7.5% salt SDS-PAGE and then transferred electrophoretically to nitrocellulose membranes (Amersham Biosciences, Little Chalfont, UK). Blots were washed in Tris buffered saline containing 0.1% Triton X-100 (TTBS) and blocked with 5% milk in TTBS, before being incubated overnight at 4°C with the ET-A

(Abcam 76259, 1:1000) or ET-B (Abcam 39960 1:1000) receptor antibody. After several washes, blots were incubated for 1hr at room temperature with porcine anti-rabbit peroxidase (1:1000; Dako), followed by several washes in blocking buffer. All primary and secondary antibodies were diluted in 1% milk in TTBS. Blots were processed and developed using the ECL Plus chemiluminescent immunoblot detection system (GE Healthcare). For beta actin staining, blots were stripped with stripping buffer (2% SDS and 7 $\mu$ l/ml  $\beta$ -mercaptoethanol in 0.05M Tris pH 6.8) for 30 min at 55<sup>0</sup>C and re-probed with mouse monoclonal anti- $\beta$ -actin (Sigma AC15 diluted at 1:10,000) for 30 minutes at room temperature to assess loading density. Protein content was assessed by densitometry using NIH Image software and IP band densities, of normal and IPAH endothelial cell extracts, normalized to those of  $\beta$ -actin, within each blot were compared.
